# Supplementary material for: A Multifunctional Polyethylene Glycol/Triethoxysilane-Modified Polyurethane Foam Dressing with High Absorbency and Antiadhesion Properties Promotes Diabetic Wound Healing
Source: MDPI journal article supplement (doi:10.3390/ijms241512506), 2023-08-07
Supplement: s1 [file s1]

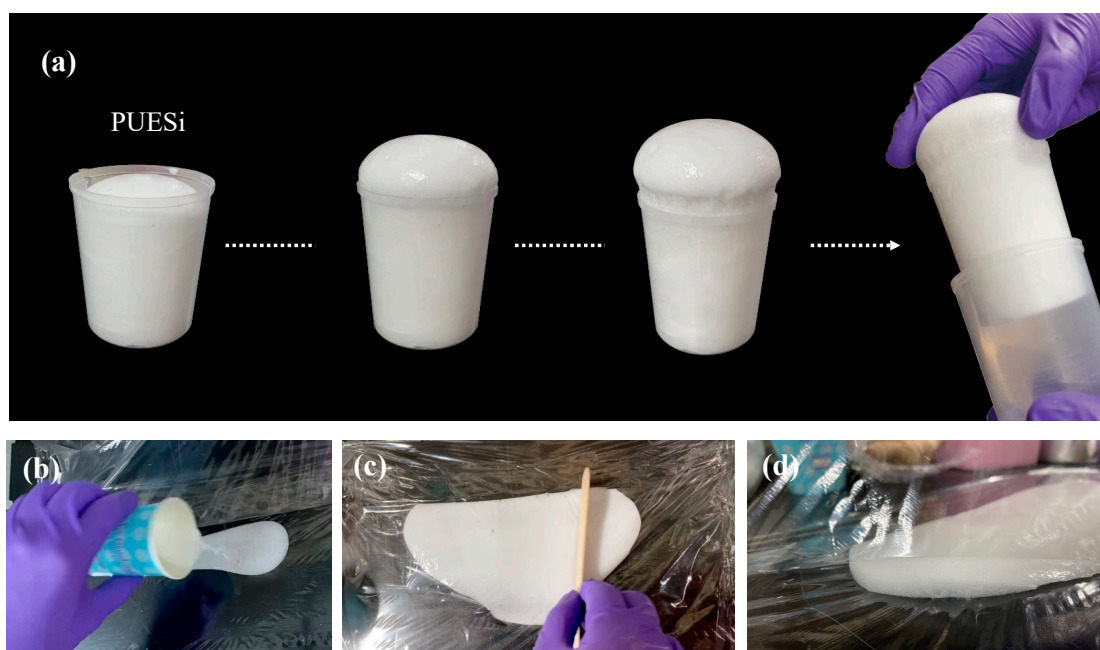

**Figure S1.** Self-foaming reaction (a) and foam dressing preparation (b, c, d).

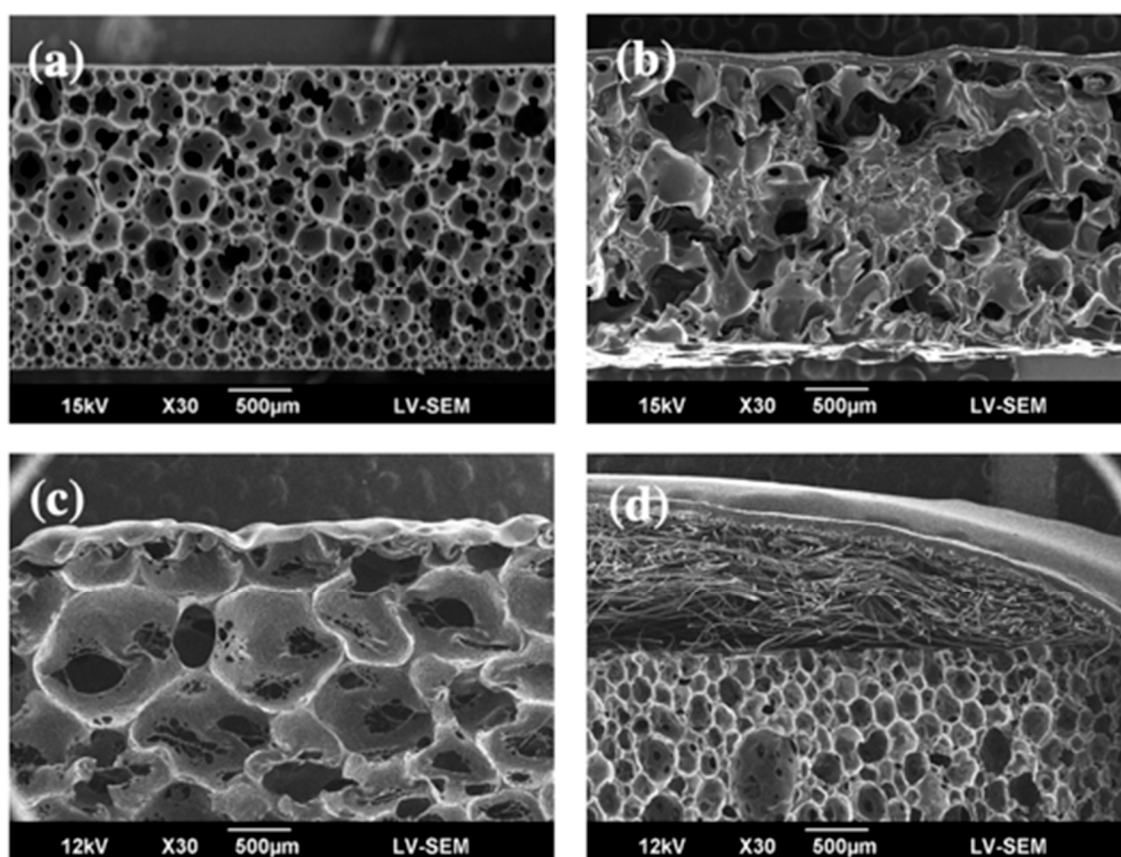

**Figure S2.** Cross-sectional scanning electron microscopy (SEM) images of PUESi (a) and the commercial PU foam dressings PolyMem (b), Mepilex (c) and ConveTec (d).
